# Supplementary material for: Alanyl-Glutamine Dipeptide Attenuates Non-Alcoholic Fatty Liver Disease Induced by a High-Fat Diet in Mice by Improving Gut Microbiota Dysbiosis
Source: MDPI journal article supplement (doi:10.3390/nu15183988), 2023-09-14
Supplement: s1 [file s1]

## Supplementary Materials

### 1. Supplementary Methods

#### 1.1 Analysis of AG in fecal samples

After 12 hours of fasting, Male C57BL/6 mice (aged 6-8 weeks) were orally administered with 1500 mg/kg of AG. The feces were collected at three different time points: prior to administration, 2 hours post-administration, and 6 hours post-administration. AG extraction was performed using a 20% acetonitrile-water solution. After thorough mixing, the supernatant was collected following centrifugation at 2000 g for 3 minutes. All samples were diluted 10 times with a 20% acetonitrile-water solution and filtered through a 0.22  $\mu$ m aqueous phase syringe filter.

After filtering the samples, analysis was performed using an AB SCIEX Triple Quad™ 4500MD coupled with a Shimadzu Nexera LC-40 liquid chromatograph in Multiple Reaction Monitoring (MRM) mode. The ion pair used was 218.1/130.1. The ion source temperature was set at 500°C, Gas1 was set to 45, Gas2 was set to 65, and the voltage was 5000V. The liquid chromatography was performed using a C18 chromatographic column (Gemini 3  $\mu$ m, 110 Å, 150×4.6 mm) from Phenomenex. The flow rate was maintained at 0.35 mL/min, and the injection volume was 5  $\mu$ L. The mobile phase consisted of the following gradient: 0.1% formic acid aqueous solution: acetonitrile = 100:0 (v/v) (0-1 min), 0.1% formic acid aqueous solution: acetonitrile = 80:20 (v/v) (1-5 min), 0.1% formic acid aqueous solution: acetonitrile = 10:90 (v/v) (5-9 min), 0.1% formic acid aqueous solution: acetonitrile = 10:90 (v/v) (9-12 min), 0.1% formic acid aqueous solution: acetonitrile = 100:0 (v/v) (12-12.5 min), 0.1% formic acid aqueous solution: acetonitrile = 100:0 (v/v) (12.5 min-15 min). The concentration of the AG standard solution was 100 ng/mL.

## 2. Supplementary Tables and Figures

### 2.1 Supplementary Table S1. Composition of the standard diet (SD) and HFD diet formulas

| Formulas                              | SD      |        | HFD    |       |
|---------------------------------------|---------|--------|--------|-------|
|                                       | gm%     | kcal%  | gm%    | kcal% |
| Protein                               | 19.2    | 20     | 26     | 20    |
| Carbohydrate                          | 67.3    | 70     | 26     | 20    |
| Fat                                   | 4.3     | 10     | 35     | 60    |
| Kcal/gm                               | 3.85    |        | 5.24   |       |
| Total                                 |         | 100    |        | 100   |
|                                       |         |        |        |       |
| Ingredient                            | gm      | kcal   | gm     | kcal  |
| Casein, 80 Mesh                       | 200     | 800    | 200    | 800   |
| L-Cystine                             | 3       | 12     | 3      | 12    |
| Corn Starch                           | 506.2   | 2024.8 | 0      | 0     |
| Maltodextrin 10                       | 125     | 500    | 125    | 500   |
| Sucrose                               | 68.8    | 275.2  | 68.8   | 275.2 |
| Cellulose                             | 50      | 0      | 50     | 0     |
| Soybean Oil                           | 25      | 225    | 25     | 225   |
| Lard                                  | 20      | 180    | 245    | 2205  |
| Mineral Mix S10026                    | 10      | 0      | 10     | 0     |
| Dicalcium Phosphate                   | 13      | 0      | 13     | 0     |
| Calcium Carbonate                     | 5.5     | 0      | 5.5    | 0     |
| Potassium Citrate, 1 H <sub>2</sub> O | 16.5    | 0      | 16.5   | 0     |
| Vitamin Mix V10001                    | 10      | 40     | 10     | 40    |
| Choline Bitartrate                    | 2       | 0      | 2      | 0     |
| Total                                 | 1055.05 | 4057   | 773.85 | 4057  |

## 2.2 Supplementary Figure S1

A

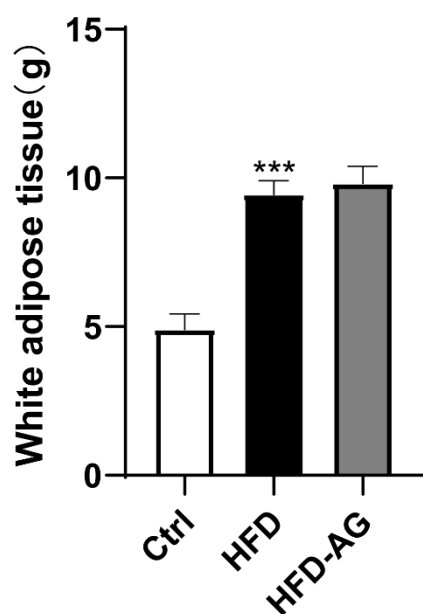

B

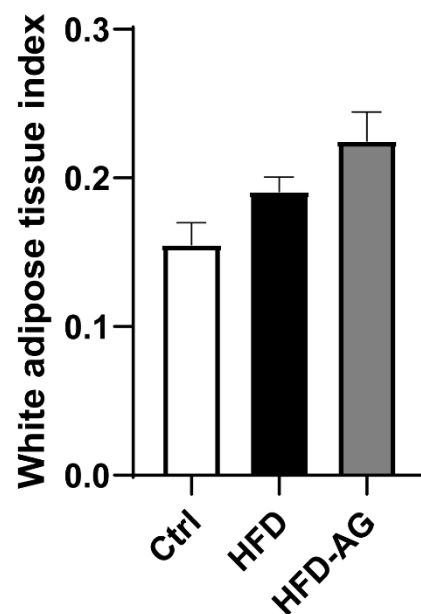

**Figure S1. Effects of AG on the white adipose tissue weight and white adipose tissue index in HFD feeding mice.** (A) White adipose tissue weight; (B) White adipose tissue index. Results are expressed as the mean  $\pm$  SEM. \*\*\*  $P < 0.001$ , compared to the Ctrl group.

## 2.3 Supplementary Figure S2

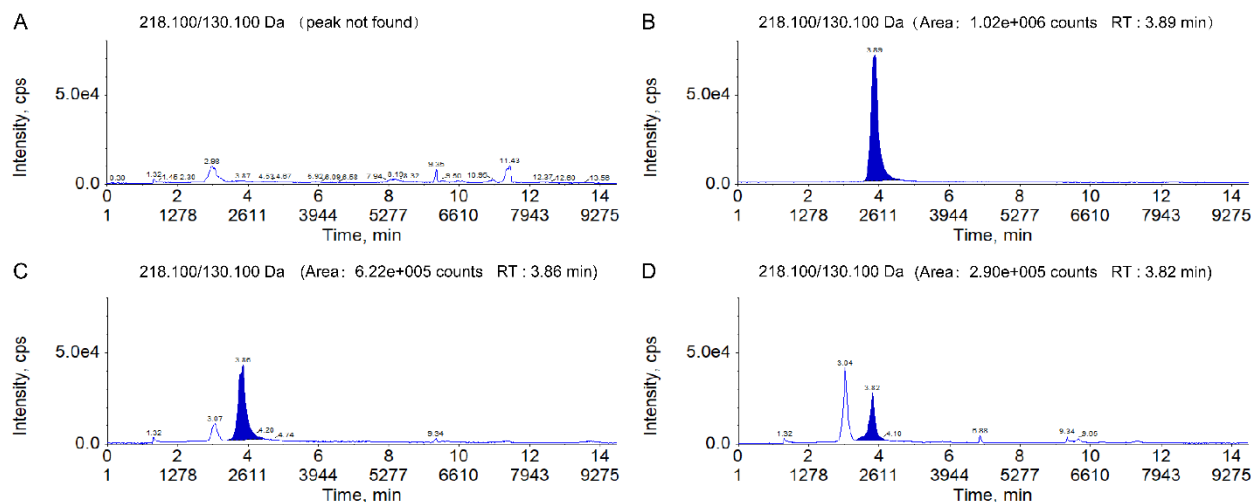

**Figure S2. LC-MS analysis of AG in fecal samples.** (A) Fecal samples collected from mice before administration; (B) 100 ng/mL AG standard solution. (C) Fecal samples collected from mice 2 hours after AG administration; (D) Fecal samples collected from mice 6 hours after AG administration. The retention time for the 100 ng/mL AG standard was 3.89 minutes, with a peak area of  $1.02 \times 10^6$ . AG was not detected in the fecal samples collected before administration. In the fecal samples collected 2 hours after AG administration, AG was detected with a peak area of  $6.22 \times 10^5$ , thus the AG content in mouse feces is calculated to be 6.098  $\mu\text{g/g}$  of feces. In the fecal samples collected 6 hours after AG administration, AG was detected with a peak area of  $2.9 \times 10^5$ , indicating an AG content of 2.843  $\mu\text{g/g}$  of feces.
